# Supplementary material for: Bearing Fault Diagnosis Method Based on RCMFDE-SPLR and Ocean Predator Algorithm Optimizing Support Vector Machine
Source: MDPI journal article supplement (doi:10.3390/e24111696), 2022-11-20
Supplement: s1 [file s1]

## **Supplementary Information**

### **Bearing Fault Diagnosis Method Based on RCMFDE-SPLR and Ocean Predator Algorithm Optimizing Support Vector Machine**

Mingxiu Yi<sup>1,2</sup>, Chengjiang Zhou<sup>1,2 \*</sup>, Limiao Yang<sup>1,2</sup>, Jintao Yang<sup>1,2 \*</sup>, Tong Tang<sup>1,2</sup>, Yunhua Jia<sup>1,2 \*</sup> and  
Xuyi Yuan<sup>3</sup>

1 School of Information Science and Technology, Yunnan Normal University, Kunming  
650500, China;

2 The Laboratory of Pattern Recognition and Artificial Intelligence, Kunming 650500,  
China;

\*Corresponding authors.

E-mail addresses: 210007@ynnu.edu.cn (C.Z.)

**One Tables and Two Figure Included**

**Table S1.** Analysis of fault recognition rate results under MPA-SVM for RCMFDE-SPLR of different data

| method      | Data1        | Data2        |
|-------------|--------------|--------------|
|             | fs=12000Hz   | fs=12000Hz   |
|             | 1772r/min    | 1730r/min    |
|             | motor load 1 | motor load 3 |
| RCMFDE-SPLR | 99.67%       | 100%         |
| MPA-SVM     |              |              |

|     | NOR  | IR1  | IR2  | IR3  | OR1  | OR2  | OR3  | B1   | B2   | B3   |
|-----|------|------|------|------|------|------|------|------|------|------|
| NOR | 1.00 | 0.00 | 0.00 | 0.00 | 0.00 | 0.00 | 0.00 | 0.00 | 0.00 | 0.00 |
| IR1 | 0.00 | 1.00 | 0.00 | 0.00 | 0.00 | 0.00 | 0.00 | 0.00 | 0.00 | 0.00 |
| IR2 | 0.00 | 0.00 | 1.00 | 0.00 | 0.00 | 0.00 | 0.00 | 0.00 | 0.00 | 0.00 |
| IR3 | 0.00 | 0.00 | 0.00 | 1.00 | 0.00 | 0.00 | 0.00 | 0.00 | 0.00 | 0.00 |
| OR1 | 0.00 | 0.00 | 0.00 | 0.00 | 1.00 | 0.00 | 0.00 | 0.00 | 0.00 | 0.00 |
| OR2 | 0.00 | 0.00 | 0.00 | 0.00 | 0.00 | 1.00 | 0.00 | 0.00 | 0.00 | 0.00 |
| OR3 | 0.00 | 0.00 | 0.00 | 0.00 | 0.00 | 0.00 | 1.00 | 0.00 | 0.00 | 0.00 |
| B1  | 0.00 | 0.00 | 0.00 | 0.00 | 0.00 | 0.00 | 0.00 | 1.00 | 0.00 | 0.00 |
| B2  | 0.00 | 0.00 | 0.00 | 0.00 | 0.00 | 0.00 | 0.00 | 0.00 | 1.00 | 0.00 |
| B3  | 0.00 | 0.00 | 0.00 | 0.00 | 0.00 | 0.00 | 0.00 | 0.03 | 0.00 | 0.97 |

**Figure S1.** Recognition rate confusion matrix under MPA-SVM for RCMFDE-SPLR of data

1.

|     | NOR  | IR1  | IR2  | IR3  | OR1  | OR2  | OR3  | B1   | B2   | B3   |
|-----|------|------|------|------|------|------|------|------|------|------|
| NOR | 1.00 | 0.00 | 0.00 | 0.00 | 0.00 | 0.00 | 0.00 | 0.00 | 0.00 | 0.00 |
| IR1 | 0.00 | 1.00 | 0.00 | 0.00 | 0.00 | 0.00 | 0.00 | 0.00 | 0.00 | 0.00 |
| IR2 | 0.00 | 0.00 | 1.00 | 0.00 | 0.00 | 0.00 | 0.00 | 0.00 | 0.00 | 0.00 |
| IR3 | 0.00 | 0.00 | 0.00 | 1.00 | 0.00 | 0.00 | 0.00 | 0.00 | 0.00 | 0.00 |
| OR1 | 0.00 | 0.00 | 0.00 | 0.00 | 1.00 | 0.00 | 0.00 | 0.00 | 0.00 | 0.00 |
| OR2 | 0.00 | 0.00 | 0.00 | 0.00 | 0.00 | 1.00 | 0.00 | 0.00 | 0.00 | 0.00 |
| OR3 | 0.00 | 0.00 | 0.00 | 0.00 | 0.00 | 0.00 | 1.00 | 0.00 | 0.00 | 0.00 |
| B1  | 0.00 | 0.00 | 0.00 | 0.00 | 0.00 | 0.00 | 0.00 | 1.00 | 0.00 | 0.00 |
| B2  | 0.00 | 0.00 | 0.00 | 0.00 | 0.00 | 0.00 | 0.00 | 0.00 | 1.00 | 0.00 |
| B3  | 0.00 | 0.00 | 0.00 | 0.00 | 0.00 | 0.00 | 0.00 | 0.00 | 0.00 | 1.00 |

**Figure S2.** Recognition rate confusion matrix under MPA-SVM for RCMFDE-SPLR of data

2.
